# Supplementary material for: Enhanced Differentiation Capacity and Transplantation Efficacy of Insulin-Producing Cell Clusters from Human iPSCs Using Permeable Nanofibrous Microwell-Arrayed Membrane for Diabetes Treatment
Source: MDPI journal article supplement (doi:10.3390/pharmaceutics14020400), 2022-02-12
Supplement: s1 [file s1]

# Supplementary Materials: Enhanced Differentiation Capacity and Transplantation Efficacy of Insulin-Producing Cell Clusters from Human iPSCs Using Permeable Nanofibrous Microwell-Arrayed Membrane for Diabetes Treatment

In Kyong Shim, Seong Jin Lee, Yu Na Lee, Dohui Kim, Hanse Goh, Jaeseung Youn, Jinah Jang, Dong Sung Kim and Song Cheol Kim

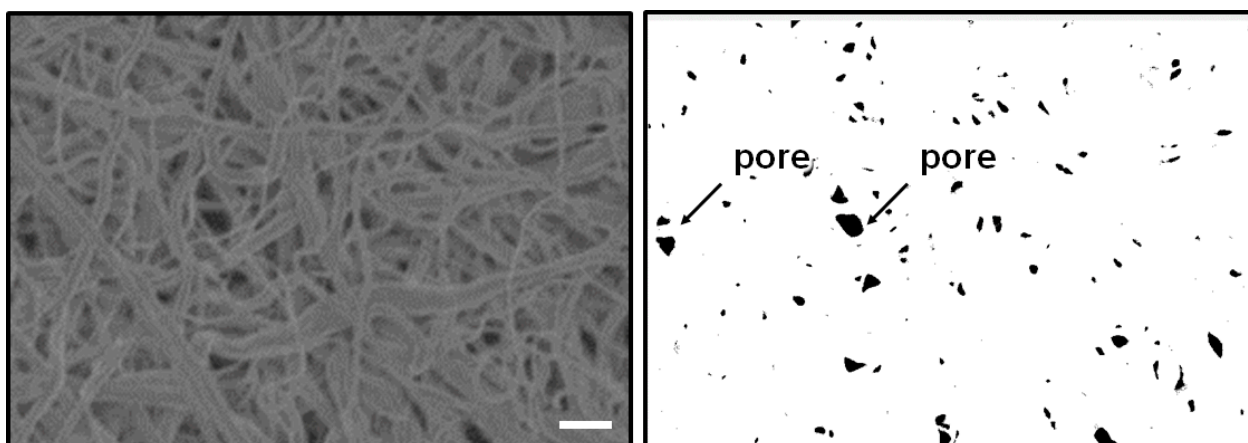

**Figure S1.** Images in investigating in-plane porosity of the NF microwell. (left) SEM image. (right) Processed image indicating pores, Scale bar: 4  $\mu\text{m}$ .

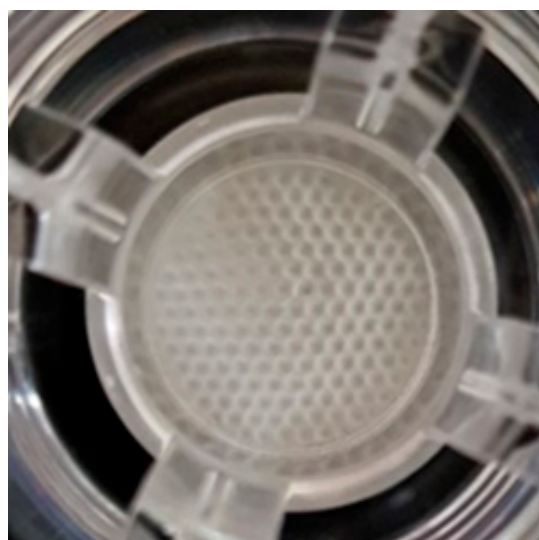

**Figure S2.** NF microwell-arrayed membrane integrated to a custom-designed 12-well insert wall.

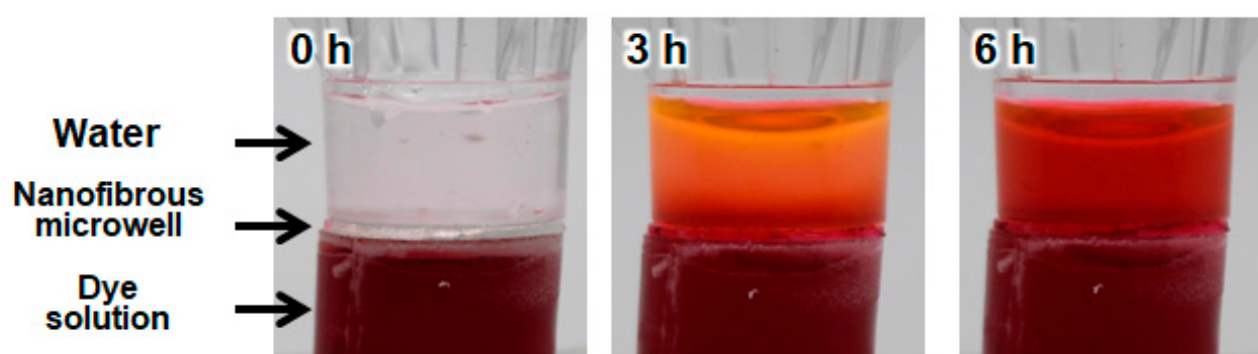

**Figure S3.** Diffusional transport test through NF microwell-arrayed membrane using red dye solution.
